# Supplementary material for: Establishment of a CRISPR/Cas9-Mediated Efficient Knockout System of Trichoderma hamatum T21 and Pigment Synthesis PKS Gene Knockout
Source: MDPI journal article supplement (doi:10.3390/jof9050595), 2023-05-19
Supplement: s1 [file s1]

## Supporting Information

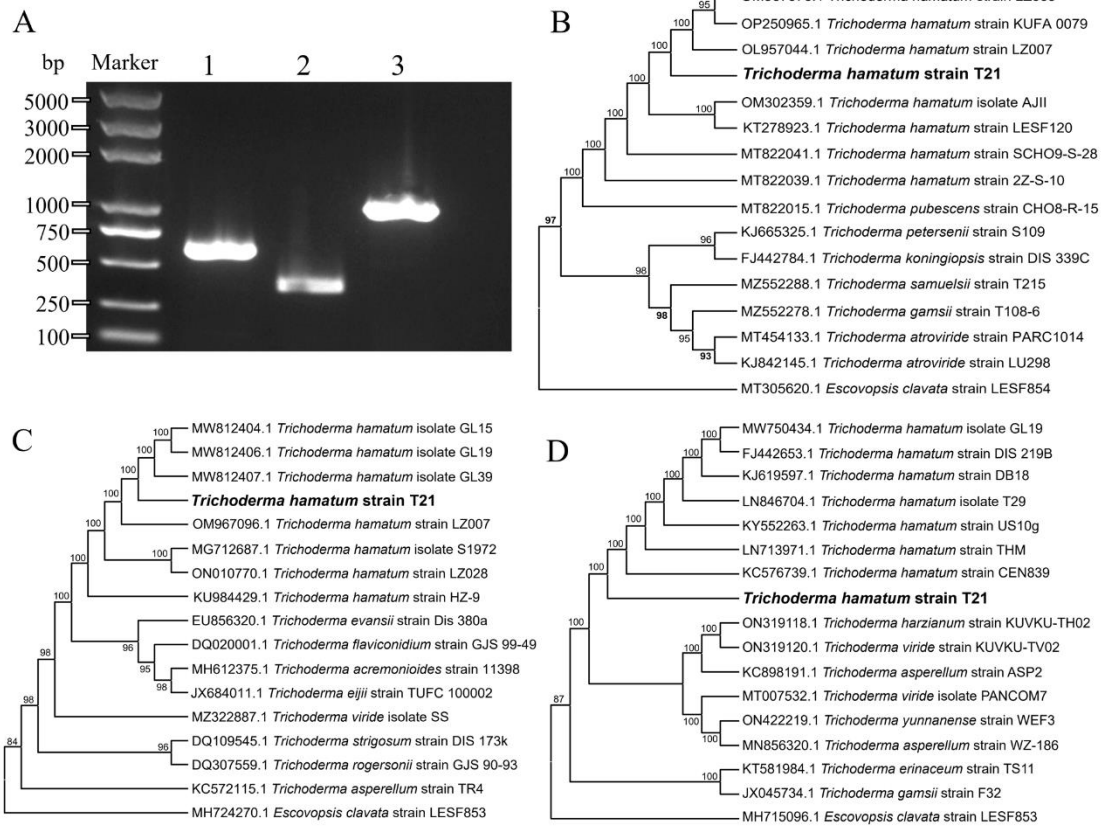

**Figure S1. Molecular identification and phylogenetic analysis of *T. hamatum* T21.** (A) PCR products of the ITS (lane 1), *tef1α* (lane 2), *rpb2* (lane 3) gene of *T. hamatum* T21. Phylogenetic tree of *T. hamatum* T21 based on ITS (B), *tef1α* (C), and *rpb2* (D) sequences.

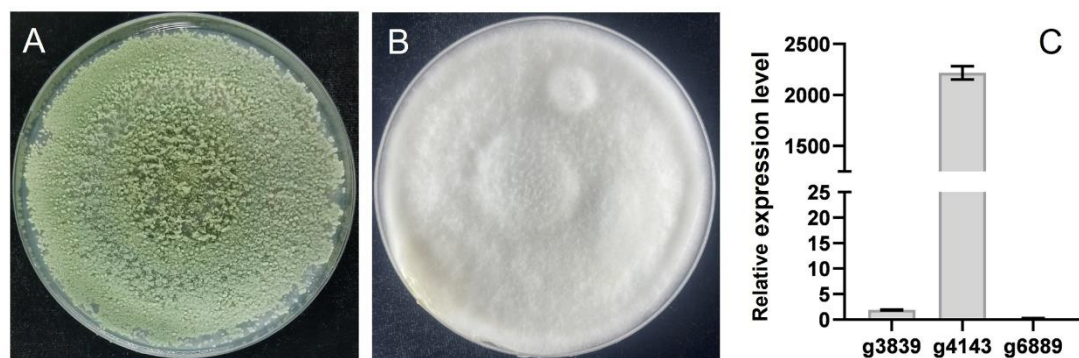

**Figure S2. Phenotypic characteristics of *T. hamatun* T21 on different mediums and analysis of pigment candidate genes.**

(A). PDA medium. (B) MOF medium. (C) A relative expression values of the three pigment candidate genes in two mediums. The *g3839*, *g4143*, and *g6889* genes were highly homologous to the pigment genes of *M. robergii* and were identified as candidate genes.

[illegible]



(**A**) Represents  $\Delta Thpks1-5$  and corresponds to Figure 6 (E-lane 5). (**B**) Represents  $\Delta Thpks1-4$ . (**C**) Represents  $\Delta Thpks1-11$  and corresponds to lanes 4 and 11 in Figure 7-B respectively.



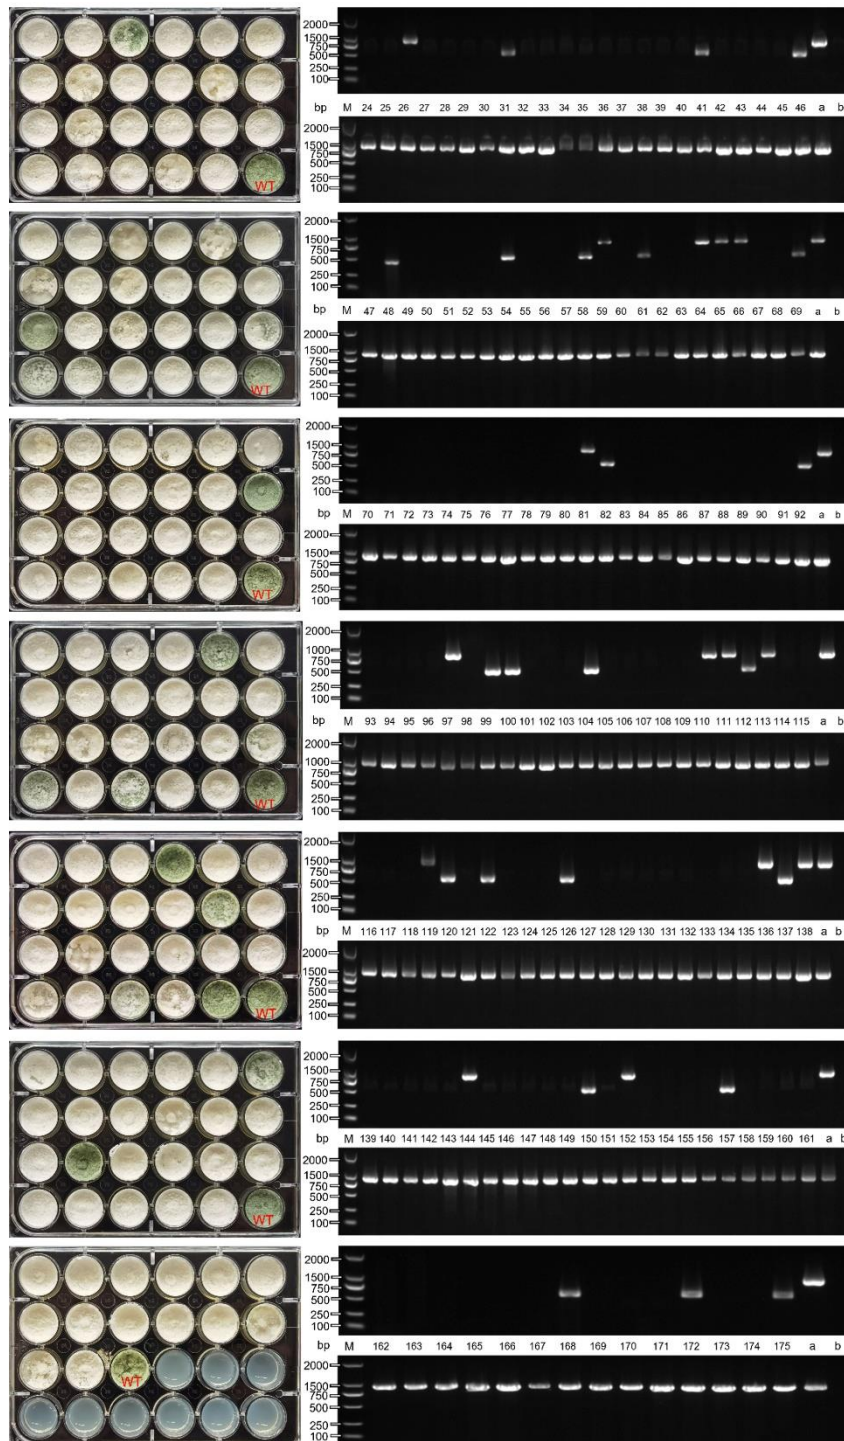

**Figure S6. All transformer identification and knockdown efficiency statistics.**

The phenotype of transformants on 24 well culture plate and the last well of each 24-well culture plate was inoculated with the T21 wild-type as a control, which is labeled with the red letters WT. The two electropherograms represent the *Thpks1* gene knockout identification and template validation of the transformants, respectively. In each electropherogram, lane a represents the T21 wild type and serves as a positive control, and lane b represents a negative control. The phenotypic identification and molecular identification of the transformants in the above figure correspond to each other.

Table S1 List of oligonucleotides used in this study

| Primer name      | Sequence                                        | Usage                                                            |
|------------------|-------------------------------------------------|------------------------------------------------------------------|
| ITS1             | TCCGTAGGTGAACCTGCGG                             | Identification of T21 Strain                                     |
| ITS4             | TCCTCCGCTTATTGATATGC                            | Identification of T21 Strain                                     |
| tef1 $\alpha$ -f | CATCGAGAAGTTCGAGAAGG                            | Identification of T21 Strain                                     |
| tef1 $\alpha$ -r | TACTTGAAGGAACCCCTTACC                           | Identification of T21 Strain                                     |
| rpb2-f           | TGGGWGAYCARAARAAGG                              | Identification of T21 Strain                                     |
| rpb2-r           | CCCATKGCTTGTTTRCCCATGGC                         | Identification of T21 Strain                                     |
| Thpyr4-up-f      | aaacgacggccagtgaattcCTACAGTAGTGCCTGCT<br>GGAGCC | Construction of Thpyr4<br>knockout vector                        |
| Thpyr4-up-r      | tcagtacaatcGGTGCCAACAGTGACCGATG                 | Construction of Thpyr4<br>knockout vector                        |
| Thpyr4-gfp-f     | gttggcaccGATTGTACTGAGAGTGCACCATATG<br>G         | Construction of Thpyr4<br>knockout vector                        |
| Thpyr4-gfp-r     | ctcgattctgGCCATTCAGGCTGCGCAA                    | Construction of Thpyr4<br>knockout vector                        |
| Thpyr4-down-f    | ctgaatggcCAGGAATCGAGGAGGCACC                    | Construction of Thpyr4<br>knockout vector                        |
| Thpyr4-down-r    | accatgattacgccaagcttCGACCATCGACTGCAACC<br>TC    | Construction of Thpyr4<br>knockout vector                        |
| (Thpyr4-f)       | GTGCTCAAGACACACTACGAC                           | Identification of Thpyr4<br>knockout vector and<br>transformants |
| (Thpyr4-r)       | ATGCCTCTACCTACAATGGC                            | Identification of Thpyr4<br>knockout vector and<br>transformants |
| Thpks1-up-f      | aaacgacggccagtgaattcCTGATCCACGCTACTTCG<br>GATT  | Construction of Thpks1<br>knockout vector                        |
| Thpks1-up-r      | cagtacaatcGAGGCTGAACAATCTGACCCTG                | Construction of Thpks1<br>knockout vector                        |
| Thpks1-gfp-f     | gttcagcctcGATTGTACTGAGAGTGCACCATAT<br>GG        | Construction of Thpks1<br>knockout vector                        |
| Thpks1-gfp-r     | gtcaaaccaagGCCATTCAGGCTGCGCAA                   | Construction of Thpks1<br>knockout vector                        |
| Thpks1-down-f    | ctgaatggcCTTGGTTTGACCGCGCTTG                    | Construction of<br>Thpks1 knockout vector                        |
| Thpks1-down-r    | accatgattacgccaagcttACCGTTCGTGGTGGACTG<br>TATG  | Construction of Thpks1<br>knockout vector                        |
| (Thpks1-f)       | GAAGCTTACCATGCGGTGTC                            | Identification of Thpks1<br>knockout vector and<br>transformants |
| (Thpks1-r)       | TACCATGGACCTACGGGATG                            | Identification of Thpks1<br>knockout vector and<br>transformants |

|             |                                                       |                                                              |
|-------------|-------------------------------------------------------|--------------------------------------------------------------|
| Cas9-gpda-f | aatgcgtcgagatgaagatctGCCATTCAGGCTGCGCA<br>A           | Construction of Thpyr4 and<br>Thpks1 CRISPR/Cas9<br>vector   |
| Cas9-gpda-r | aagacactgcggGGTGATGTCTGCTCAAGCGG                      | Construction of Thpyr4 and<br>Thpks1 CRISPR/Cas9<br>vector   |
| pmv-f       | acatcaccCCGCAGTGTCTTGCGTCTCT                          | Construction of Thpyr4 and<br>Thpks1 CRISPR/Cas9<br>vector   |
| pmv-r       | taagtTTGGCAGTGACTCCGTCTCTG                            | Construction of Thpyr4 and<br>Thpks1 CRISPR/Cas9<br>vector   |
| Cas9-trpc-f | cggagtcactgccaaACTTAACGTTACTGAAATCAT<br>CAAACAG       | Construction of Thpyr4 and<br>Thpks1 CRISPR/Cas9<br>vector   |
| Cas9-trpc-r | cgcagcctgaatggcgatataAAGAAGGATTACCTCTA<br>AACAAGGTACC | Construction of Thpyr4 and<br>Thpks1 CRISPR/Cas9<br>vector   |
| (Gpda-f)    | TAAGCGAAGGAGAATGTGAAGCC                               | Identification of Thpyr4<br>and Thpks1 CRISPR/Cas9<br>vector |
| (Trpc-r)    | CTGGAAGAGGTAAACCCGAAACG                               | Identification of Thpyr4<br>and Thpks1 CRISPR/Cas9<br>vector |
| actin-f     | TCGTGACATCAAGGAGAAG                                   | reference                                                    |
| actin-r     | TCAAGACCAAGGACAGAAG                                   | reference                                                    |
| Q-3839-f    | CCGCATTTGAAGCCTTTGAG                                  | qPCR Analysis                                                |
| Q-3839-r    | CAGGGAACCTGAGTTTCCTGTG                                | qPCR Analysis                                                |
| Q-4143-f    | ATCTCGCCGAAAGAGGCTGA                                  | qPCR Analysis                                                |
| Q-4143-r    | CTCGCTGGGTTGATGGTGTC                                  | qPCR Analysis                                                |
| Q-6889-f    | ATGCGAGACGTTGGCAAATC                                  | qPCR Analysis                                                |
| Q-6889-r    | ACTTGACTACGGCAGCCTTGA                                 | qPCR Analysis                                                |
| RT-cas9-f   | CTACAAGGTCTACGACGTCC                                  | RT-PCR Analysis                                              |
| RT-cas9-r   | TCGCTGATCAGCTTCTGTTC                                  | RT-PCR Analysis                                              |

---



Table S2 Genome assembly and annotation statistics for *T. hamatum* T21 genomes.

| Indicators of genome assembly         | T21   |
|---------------------------------------|-------|
| length of genome assembly (Mb)        | 42.05 |
| number of contigs                     | 251   |
| N50 of contigs (Mb)                   | 2.04  |
| Total length of retrotransposons (Mb) | 16.17 |
| Number of annotated genes             | 8,170 |
| Average CDS length (bp)               | 1470  |
| Average protein length (bp)           | 490   |
